# Supplementary material for: Targeting survivin as a potential new treatment for chondrosarcoma of bone
Source: PubMed Central journal article supplement (PMC4945750; doi:10.1038/oncsis.2016.33), 2016-05-09
Supplement: oncsis201633x1.pdf [file oncsis201633x1.pdf]

**Supplementary figure 1**

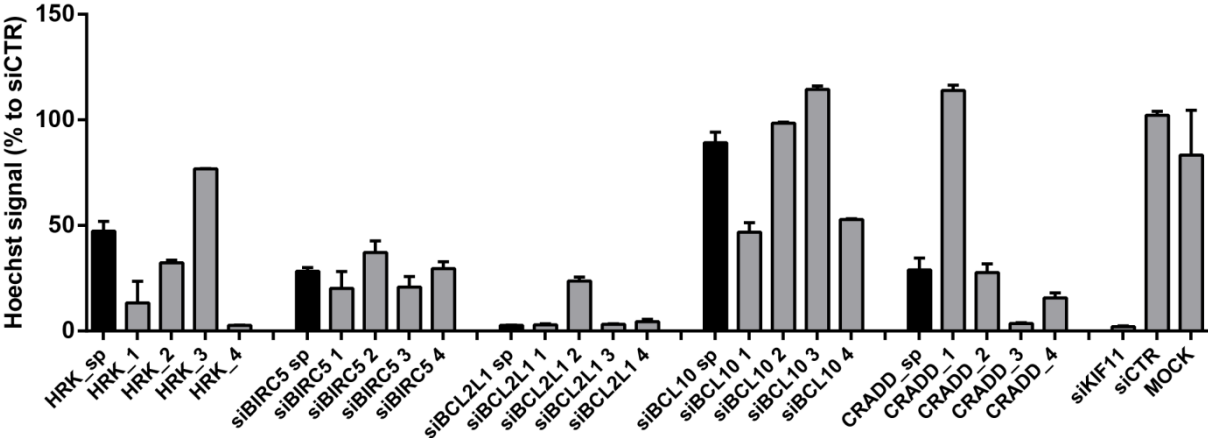

**Figure 1: Results of deconvolution.** Area of cells as a percentage to control siRNA. *BCL2L1*, *BIRC5*, *CRADD* and *HRK* all show 3/4 or 4/4 siRNAs that mimic the smart pool. Data represent means of duplicate values with range. Black bars represent the smart pool and grey bars represent individual siRNAs.
