# Supplementary material for: Targeting survivin as a potential new treatment for chondrosarcoma of bone
Source: PubMed Central journal article supplement (PMC4945750; doi:10.1038/oncsis.2016.33), 2016-05-09
Supplement: oncsis201633x2.pdf [file oncsis201633x2.pdf]

Supplementary figure 2

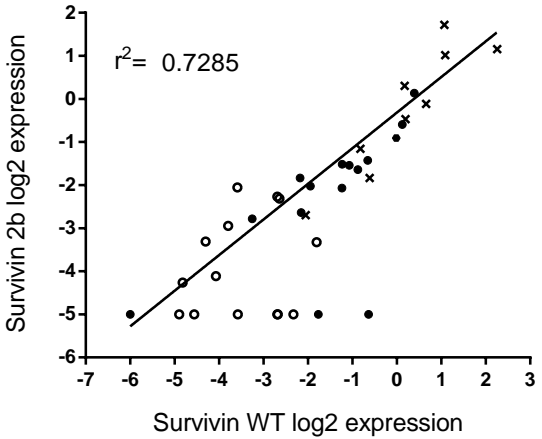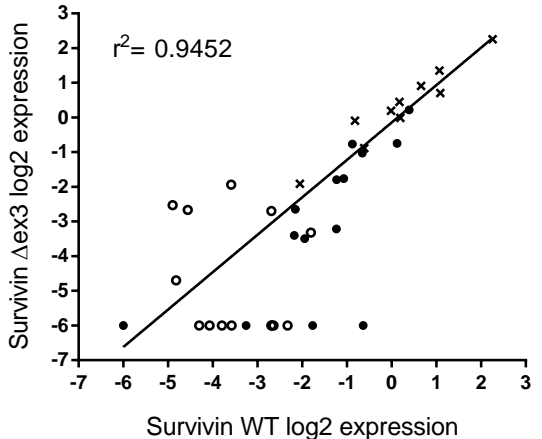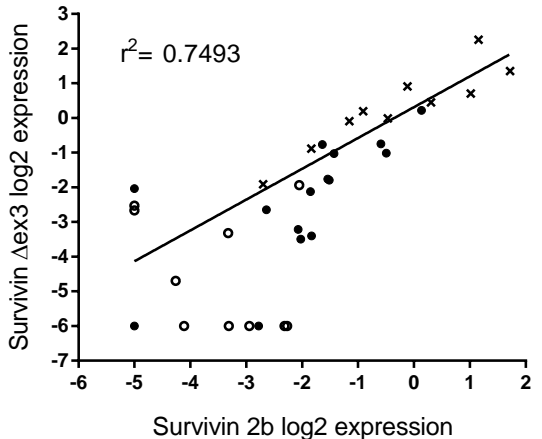

**Figure 2: Correlation survivin expression A, B, C)** Survivin expression of all three isoforms was correlated in chondrosarcoma tissues and cell lines. Expression is plotted as log<sub>2</sub> and r<sup>2</sup> was determined to assess correlation. Black dots indicate high grade chondrosarcoma, white dots indicate low grade chondrosarcoma and crosses indicate chondrosarcoma cell lines.
