# Supplementary material for: Targeting survivin as a potential new treatment for chondrosarcoma of bone
Source: PubMed Central journal article supplement (PMC4945750; doi:10.1038/oncsis.2016.33), 2016-05-09
Supplement: oncsis201633x3.pdf [file oncsis201633x3.pdf]

Supplementary figure 3

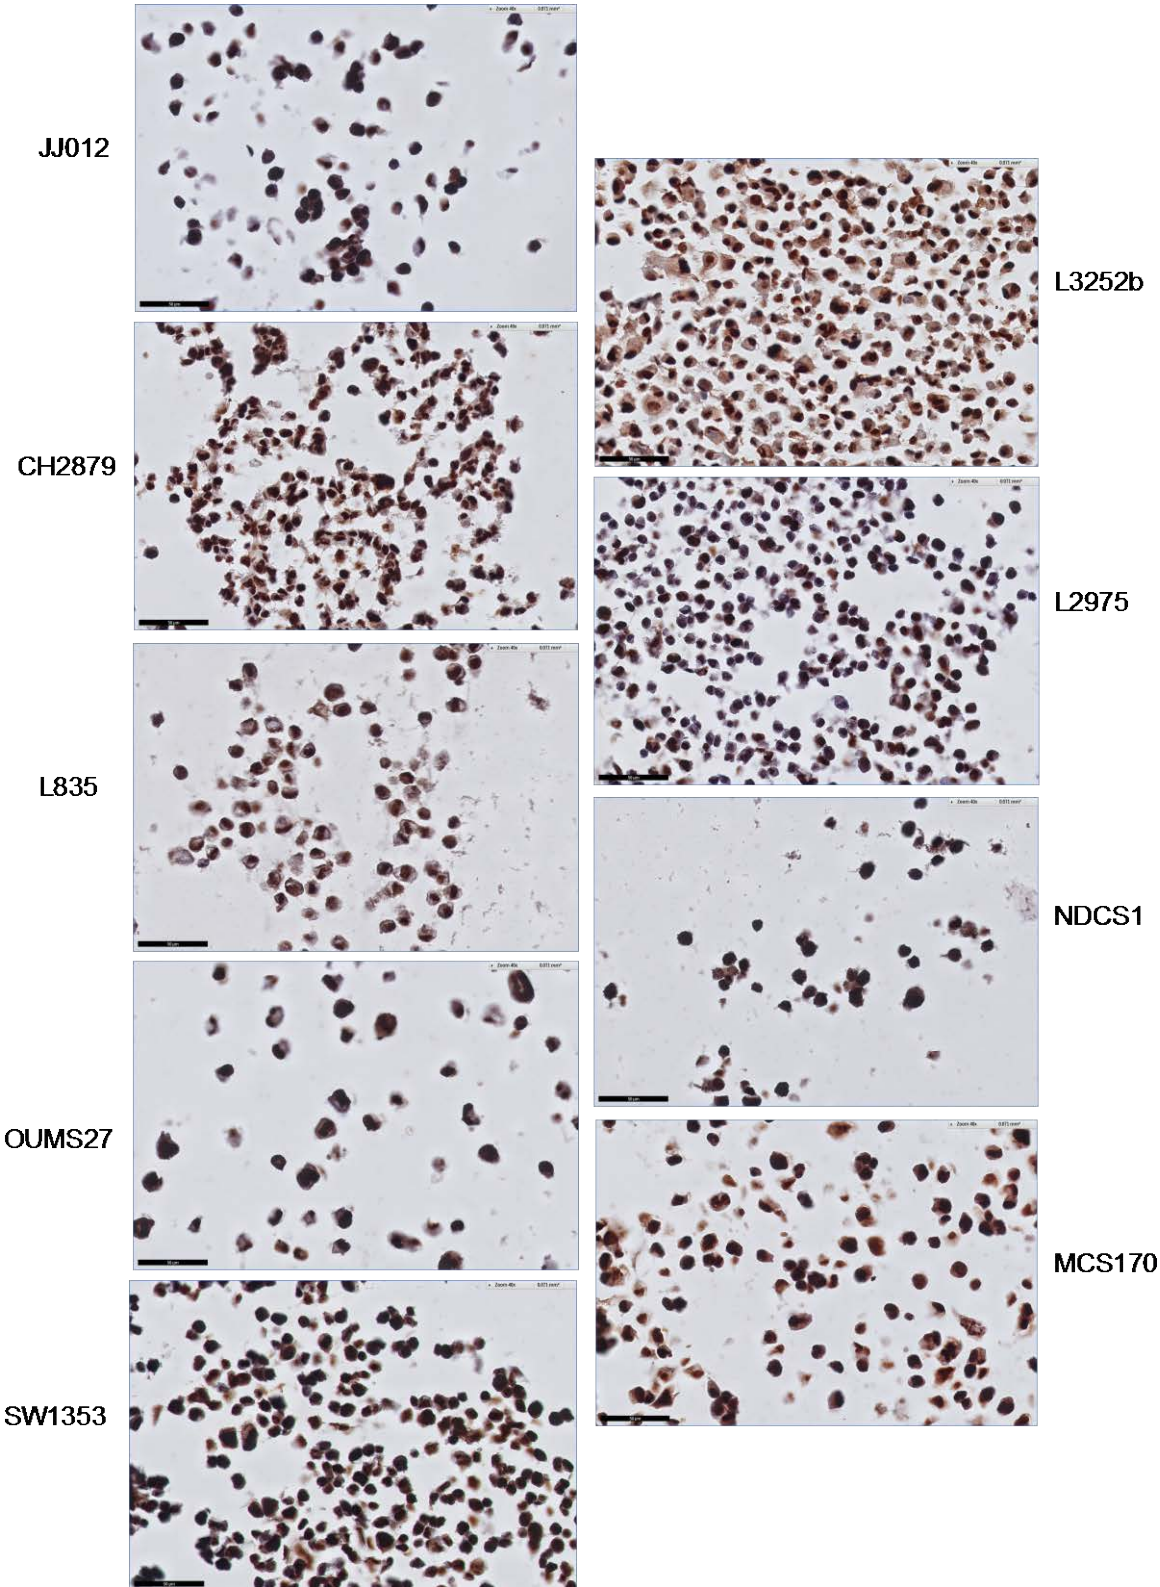

**Figure 3. Survivin staining in chondrosarcoma cell lines.** Survivin is highly expressed in the nucleus of all chondrosarcoma cell lines.
