# Supplementary material for: Targeting survivin as a potential new treatment for chondrosarcoma of bone
Source: PubMed Central journal article supplement (PMC4945750; doi:10.1038/oncsis.2016.33), 2016-05-09
Supplement: oncsis201633x4.pdf [file oncsis201633x4.pdf]

## Supplementary figure 4

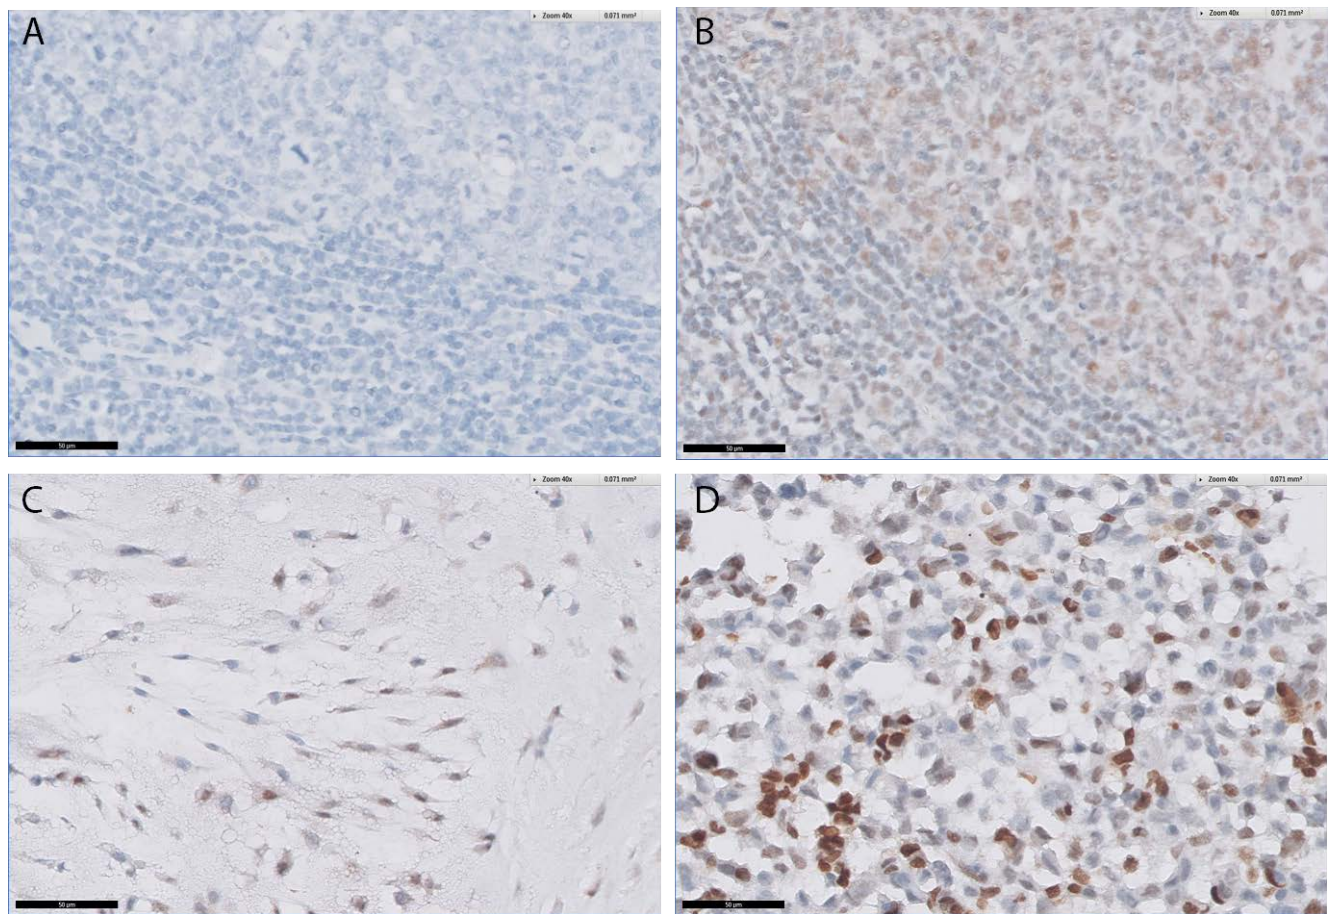

**Figure 4. Mosaic staining pattern of P53 protein in CH2879. A, B) Negative (A) and positive control (B) tonsil tissue. C, D) Mosaic P53 staining in primary tumor tissue (C) and cell pellet (D) of CH2879 cell line.**
