# Supplementary material for: Targeting survivin as a potential new treatment for chondrosarcoma of bone
Source: PubMed Central journal article supplement (PMC4945750; doi:10.1038/oncsis.2016.33), 2016-05-09
Supplement: oncsis201633x6.pdf [file oncsis201633x6.pdf]

Supplementary figure 6

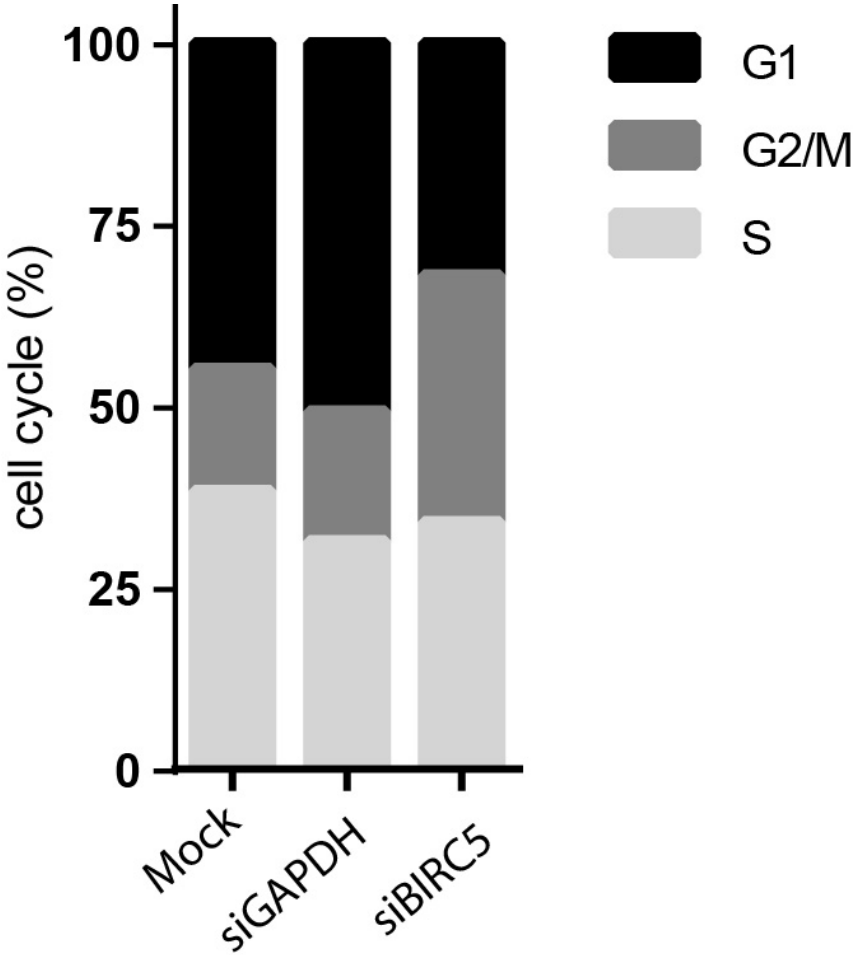

**S**Figure 6. BIRC5 knock down in JJ012 cells results in an increase in G2/M phase. Cell cycle analysis performed after knock down of GAPDH or BIRC5 in chondrosarcoma cells. Results shown are representative of a duplicate measurement.
