# Supplementary material for: Targeting survivin as a potential new treatment for chondrosarcoma of bone
Source: PubMed Central journal article supplement (PMC4945750; doi:10.1038/oncsis.2016.33), 2016-05-09
Supplement: oncsis201633x8.pdf [file oncsis201633x8.pdf]

**Supplementary table 2**

| Well | Gene Symbol   | Gene Id | Accession Number | GI Number | Sequence              |
|------|---------------|---------|------------------|-----------|-----------------------|
| A02  | <i>CASP1</i>  | 834     | NM_033295        | 73622117  | CCGCAAGGUUCGAUUUUCA   |
| A02  | <i>CASP1</i>  | 834     | NM_033295        | 73622117  | GAAUAUGCCUGUCCUGUG    |
| A02  | <i>CASP1</i>  | 834     | NM_033295        | 73622117  | GACUCAUUGAACAUUUGCA   |
| A02  | <i>CASP1</i>  | 834     | NM_033295        | 73622117  | AGACAUCCCACAAUGGGCU   |
| A03  | <i>CASP10</i> | 843     | NM_032974        | 98985797  | GAAAUGACCUCCCUAAGUU   |
| A03  | <i>CASP10</i> | 843     | NM_032974        | 98985797  | GAAGGCAGCUGGUUAUUAUC  |
| A03  | <i>CASP10</i> | 843     | NM_032974        | 98985797  | CAAAGGGUUUCUCUGUUUA   |
| A03  | <i>CASP10</i> | 843     | NM_032974        | 98985797  | ACAAUAAUGUGACGAAAGU   |
| A04  | <i>CASP14</i> | 23581   | NM_012114        | 6912285   | GGACAUUUCUUGGAACUUC   |
| A04  | <i>CASP14</i> | 23581   | NM_012114        | 6912285   | ACAGAUGCCUUGCACGUUU   |
| A04  | <i>CASP14</i> | 23581   | NM_012114        | 6912285   | GAGCUAAGCCCAAGGUGUA   |
| A04  | <i>CASP14</i> | 23581   | NM_012114        | 6912285   | GAGAUGAGAUUGUGAUGGU   |
| A05  | <i>CASP2</i>  | 835     | NM_032983        | 39995060  | GAACGCACUUAUCAAGGAU   |
| A05  | <i>CASP2</i>  | 835     | NM_032983        | 39995060  | GGAGAGUGAUGCCGGUAAA   |
| A05  | <i>CASP2</i>  | 835     | NM_032983        | 39995060  | GCACUGGUGUUGAGCAAUG   |
| A05  | <i>CASP2</i>  | 835     | NM_032983        | 39995060  | UGACGUCCAUGUUCUAUGU   |
| A06  | <i>CASP3</i>  | 836     | NM_032991        | 73622122  | CCGACAAGCUUGAAUUUUAU  |
| A06  | <i>CASP3</i>  | 836     | NM_032991        | 73622122  | GGUUUAUUUUCUUGGCGAA   |
| A06  | <i>CASP3</i>  | 836     | NM_032991        | 73622122  | UGAGAUGGGUUUAUGUAUA   |
| A06  | <i>CASP3</i>  | 836     | NM_032991        | 73622122  | GAUGCGUGAUGUUUCUAAA   |
| A07  | <i>CASP4</i>  | 837     | NM_001225        | 73622123  | GGACUUAUGUGUAGAUGUA   |
| A07  | <i>CASP4</i>  | 837     | NM_001225        | 73622123  | GAGGGAAUCUGCGGAACUG   |
| A07  | <i>CASP4</i>  | 837     | NM_001225        | 73622123  | GAGACUUAUGUAAAGAAAGA  |
| A07  | <i>CASP4</i>  | 837     | NM_001225        | 73622123  | UAGAGGAAGUAUUUCGGAA   |
| A08  | <i>CASP6</i>  | 839     | NM_032992        | 73622127  | CAUGGUACAUUCAAGAUUU   |
| A08  | <i>CASP6</i>  | 839     | NM_032992        | 73622127  | AAAUAUGGCUCCUCCUAG    |
| A08  | <i>CASP6</i>  | 839     | NM_032992        | 73622127  | CAACAUAAACUGAGGUGGAU  |
| A08  | <i>CASP6</i>  | 839     | NM_032992        | 73622127  | GUUCAAAGGAGACAAGUGU   |
| A09  | <i>CASP7</i>  | 840     | NM_033340        | 73623014  | GGGCAAUUGCAUCAUAAUA   |
| A09  | <i>CASP7</i>  | 840     | NM_033340        | 73623014  | GAACUCUACUUCAGUCAAU   |
| A09  | <i>CASP7</i>  | 840     | NM_033340        | 73623014  | UACCGUCCCUCUUCAGUAA   |
| A09  | <i>CASP7</i>  | 840     | NM_033340        | 73623014  | CCAGACCGGUCCUCGUUUG   |
| A10  | <i>CASP8</i>  | 841     | NM_033358        | 122056472 | GGACAAAGUUUACCAAUUG   |
| A10  | <i>CASP8</i>  | 841     | NM_033358        | 122056472 | GAAGAUAAUCAACGACUUA   |
| A10  | <i>CASP8</i>  | 841     | NM_033358        | 122056472 | CAACGACUAUGAAGAAUUC   |
| A10  | <i>CASP8</i>  | 841     | NM_033358        | 122056472 | GCAAGAACC CAUCAAGGAU  |
| A11  | <i>CASP9</i>  | 842     | NM_032996        | 14790127  | GCUUCCAGAUUGACGACAA   |
| A11  | <i>CASP9</i>  | 842     | NM_032996        | 14790127  | CCAGGCAGCUGAUCAUAGA   |
| A11  | <i>CASP9</i>  | 842     | NM_032996        | 14790127  | GGACAUUGCUGGCUUCGUUU  |
| A11  | <i>CASP9</i>  | 842     | NM_032996        | 14790127  | GGACUUUGCAGCCGGCACA   |
| B02  | <i>BCL10</i>  | 8915    | NM_003921        | 119466529 | GAAGAUUACAGAUGAAGUG   |
| B02  | <i>BCL10</i>  | 8915    | NM_003921        | 119466529 | GCCACCAGAUCUACAGUUA   |
| B02  | <i>BCL10</i>  | 8915    | NM_003921        | 119466529 | GAAAUUUUCUUGUCGAACAU  |
| B02  | <i>BCL10</i>  | 8915    | NM_003921        | 119466529 | GGGCAUCCACUGUCAUGUA   |
| B03  | <i>BCL2</i>   | 596     | NM_000657        | 72198345  | GGAGGAUUGUGGCCUUCUUCU |
| B03  | <i>BCL2</i>   | 596     | NM_000657        | 72198345  | GGGAGAUAGUGAUGAAGUA   |
| B03  | <i>BCL2</i>   | 596     | NM_000657        | 72198345  | UCAUGUGUGUGGAGAGCGU   |
| B03  | <i>BCL2</i>   | 596     | NM_000657        | 72198345  | GAAGUACAUCUUAUAUUAAG  |
| B04  | <i>BCL2A1</i> | 597     | NM_004049        | 14574570  | GGAAAGAUCUGUGAAAUGC   |
| B04  | <i>BCL2A1</i> | 597     | NM_004049        | 14574570  | GAAGGUUAUCUCAUCAAGA   |
| B04  | <i>BCL2A1</i> | 597     | NM_004049        | 14574570  | CCUAUAAGGAGAUUUCUAUA  |

|     |                |       |              |           |                      |
|-----|----------------|-------|--------------|-----------|----------------------|
| B04 | <i>BCL2A1</i>  | 597   | NM_004049    | 14574570  | UGACUGAUUUGGAAACGAU  |
| B05 | <i>BCL2L1</i>  | 598   | NM_001191    | 20336333  | CCUACAAGCUUUCCCAGAA  |
| B05 | <i>BCL2L1</i>  | 598   | NM_001191    | 20336333  | GGAGGCAGGCGACGAGUUU  |
| B05 | <i>BCL2L1</i>  | 598   | NM_001191    | 20336333  | GAUUCAGGCUGCUUGGGAU  |
| B05 | <i>BCL2L1</i>  | 598   | NM_001191    | 20336333  | GAAAGGGCCAGGAACGCUU  |
| B06 | <i>BCL2L10</i> | 10017 | NM_020396    | 20336328  | UCUCUGGACACGAUUUUUA  |
| B06 | <i>BCL2L10</i> | 10017 | NM_020396    | 20336328  | AGAGUGGUGACGCUCGUGA  |
| B06 | <i>BCL2L10</i> | 10017 | NM_020396    | 20336328  | GGAGCAGGAGGGCGACGUC  |
| B06 | <i>BCL2L10</i> | 10017 | NM_020396    | 20336328  | GGAACCGCUUCGAGCUGGU  |
| B07 | <i>BCL2L11</i> | 10018 | NM_207002    | 116734658 | CCGAGAAGGUAGACAAUUG  |
| B07 | <i>BCL2L11</i> | 10018 | NM_207002    | 116734658 | AUGUAAGUUCUGAGUGUGA  |
| B07 | <i>BCL2L11</i> | 10018 | NM_207002    | 116734658 | GUUCUGAGUGUGACCGAGA  |
| B07 | <i>BCL2L11</i> | 10018 | NM_207002    | 116734658 | UGAUGUAAGUUCUGAGUGU  |
| B08 | <i>BCL2L14</i> | 79370 | NM_030766    | 13540528  | GAAAUUCCCAAUCCAGUGA  |
| B08 | <i>BCL2L14</i> | 79370 | NM_030766    | 13540528  | GUCAAAGGACGUUGGAAUA  |
| B08 | <i>BCL2L14</i> | 79370 | NM_030766    | 13540528  | UAACUGAGGGUCUCUCCUU  |
| B08 | <i>BCL2L14</i> | 79370 | NM_030766    | 13540528  | GGAAUUGUUCAGCAAUGA   |
| B09 | <i>BCL2L2</i>  | 599   | NM_004050    | 157266332 | GGAAGAGUGAGCAGGACAC  |
| B09 | <i>BCL2L2</i>  | 599   | NM_004050    | 157266332 | CAUAAGUGCUGAUCUAGAA  |
| B09 | <i>BCL2L2</i>  | 599   | NM_004050    | 157266332 | GCAUAUGGGUUCUAGAGUA  |
| B09 | <i>BCL2L2</i>  | 599   | NM_004050    | 157266332 | GUUAUAAGCUGAGGCAGAA  |
| B10 | <i>BAD</i>     | 572   | NM_004322    | 14670386  | CAGAGUUUGAGCCGAGUGA  |
| B10 | <i>BAD</i>     | 572   | NM_004322    | 14670386  | GUUCCAGAUCCAGAGUUU   |
| B10 | <i>BAD</i>     | 572   | NM_004322    | 14670386  | GCAACGCAGAUCCGCGCAA  |
| B10 | <i>BAD</i>     | 572   | NM_004322    | 14670386  | GUGACGAGUUUGUGGACUC  |
| B11 | <i>BAG1</i>    | 573   | NM_004323    | 124494250 | GCGAAGAGAUCAAUCGGAG  |
| B11 | <i>BAG1</i>    | 573   | NM_004323    | 124494250 | GGGCAGCAGUGAACCCAGUU |
| B11 | <i>BAG1</i>    | 573   | NM_004323    | 124494250 | ACACUGAUCCUGCCAGAAA  |
| B11 | <i>BAG1</i>    | 573   | NM_004323    | 124494250 | CAAUAGAGCAGUUUAUGAA  |
| C02 | <i>BAG4</i>    | 9530  | NM_004874    | 14574569  | GUUAUACUCAGACCAGUUA  |
| C02 | <i>BAG4</i>    | 9530  | NM_004874    | 14574569  | GAUAUCCGCCUUCACAGAA  |
| C02 | <i>BAG4</i>    | 9530  | NM_004874    | 14574569  | UAUCCUAGCUACAAUUCUA  |
| C02 | <i>BAG4</i>    | 9530  | NM_004874    | 14574569  | GAGAAGGUCCAGUAUCUUG  |
| C03 | <i>BAG5</i>    | 9529  | NM_001015048 | 62548853  | GAAGAAGGCAUCCAAGAUUA |
| C03 | <i>BAG5</i>    | 9529  | NM_001015048 | 62548853  | GAAAUUCUGAUGAAUGGGAG |
| C03 | <i>BAG5</i>    | 9529  | NM_001015048 | 62548853  | CAACAUCCUUCUUAUUAGUA |
| C03 | <i>BAG5</i>    | 9529  | NM_001015048 | 62548853  | GAAAUUAUCGGAGGGAGGU  |
| C04 | <i>BAK1</i>    | 578   | NM_001188    | 109698605 | CAGAGAAUGCCUAUGAGUA  |
| C04 | <i>BAK1</i>    | 578   | NM_001188    | 109698605 | GCUUCGUGGUCGACUUCAU  |
| C04 | <i>BAK1</i>    | 578   | NM_001188    | 109698605 | CAACCGACGCUAUGACUCA  |
| C04 | <i>BAK1</i>    | 578   | NM_001188    | 109698605 | CGACAUCAACCGACGCUAU  |
| C05 | <i>BAX</i>     | 581   | NM_138763    | 163659849 | CUGAGCAGAUCAUGAAGAC  |
| C05 | <i>BAX</i>     | 581   | NM_138763    | 163659849 | GAACUGAUCAGAACCAUCA  |
| C05 | <i>BAX</i>     | 581   | NM_138763    | 163659849 | ACAUGUUUUCUGACGGCAA  |
| C05 | <i>BAX</i>     | 581   | NM_138763    | 163659849 | CAUUGGACUCCUCCGGGA   |
| C06 | <i>BBC3</i>    | 27113 | NM_014417    | 24475588  | CCGAGAUUGGAGCCAAUUA  |
| C06 | <i>BBC3</i>    | 27113 | NM_014417    | 24475588  | CGGACGACCUCAACGCACA  |
| C06 | <i>BBC3</i>    | 27113 | NM_014417    | 24475588  | CCUGGAGGGUCCUGUACAA  |
| C06 | <i>BBC3</i>    | 27113 | NM_014417    | 24475588  | GGCGGAGACAAGAGGAGCA  |
| C07 | <i>BMF</i>     | 90427 | NM_001003943 | 51558703  | GAACCAAAAUCGUGUGUGG  |
| C07 | <i>BMF</i>     | 90427 | NM_001003943 | 51558703  | AAUCGUGUGUGGUGGCAGA  |
| C07 | <i>BMF</i>     | 90427 | NM_001003943 | 51558703  | GAGUAACAGAUACGAUUA   |
| C07 | <i>BMF</i>     | 90427 | NM_001003943 | 51558703  | GAAUCUACCAGUUGUCGAA  |
| C08 | <i>BOK</i>     | 666   | NM_032515    | 34335395  | GGAGCGCGCCCGAGCGUGC  |

|     |               |       |              |           |                      |
|-----|---------------|-------|--------------|-----------|----------------------|
| C08 | <i>BOK</i>    | 666   | NM_032515    | 34335395  | GGCCCAGCGUCUACCGCAA  |
| C08 | <i>BOK</i>    | 666   | NM_032515    | 34335395  | AGAUCAUGGACGCCUUUGA  |
| C08 | <i>BOK</i>    | 666   | NM_032515    | 34335395  | GAUGGACUGAUGUCCUCA   |
| C09 | <i>MCL1</i>   | 4170  | NM_182763    | 33519457  | GGACCAACUACAAUUAAU   |
| C09 | <i>MCL1</i>   | 4170  | NM_182763    | 33519457  | GCUACGUAGUUCGGGCAA   |
| C09 | <i>MCL1</i>   | 4170  | NM_182763    | 33519457  | CGAAGGAAGUAUCGAAUUU  |
| C09 | <i>MCL1</i>   | 4170  | NM_182763    | 33519457  | AGAACGAAUUGAUGUGUAA  |
| C10 | <i>BID</i>    | 637   | NM_197967    | 37574727  | GCCAGAAGCUACUGCGAUG  |
| C10 | <i>BID</i>    | 637   | NM_197967    | 37574727  | UGCAAUACAUACCACGCUA  |
| C10 | <i>BID</i>    | 637   | NM_197967    | 37574727  | GCACCUACGUGAGGAGCUU  |
| C10 | <i>BID</i>    | 637   | NM_197967    | 37574727  | GAGUAAGGGCACUGACGGA  |
| C11 | <i>HRK</i>    | 8739  | NM_003806    | 4504492   | CUGCUCGGCAGGCGGAACU  |
| C11 | <i>HRK</i>    | 8739  | NM_003806    | 4504492   | UAGGCGACGAGCUGCACCA  |
| C11 | <i>HRK</i>    | 8739  | NM_003806    | 4504492   | GCUCAAGGCGCUAGGCGAC  |
| C11 | <i>HRK</i>    | 8739  | NM_003806    | 4504492   | UCAAGGCGCUAGGCGACGA  |
| D02 | <i>PMAIP1</i> | 5366  | NM_021127    | 148922873 | AAACUGAACUCCGGCAGA   |
| D02 | <i>PMAIP1</i> | 5366  | NM_021127    | 148922873 | AAUCUGAUUCCAAACUCU   |
| D02 | <i>PMAIP1</i> | 5366  | NM_021127    | 148922873 | CUGGAAGUCGAGUGUCUA   |
| D02 | <i>PMAIP1</i> | 5366  | NM_021127    | 148922873 | GCAAGAACGCUCAACCGAG  |
| D03 | <i>BIK</i>    | 638   | NM_001197    | 21536418  | CCAUGGAGGUUCUUGGCAU  |
| D03 | <i>BIK</i>    | 638   | NM_001197    | 21536418  | AAGAGGACCUGGACCCUAU  |
| D03 | <i>BIK</i>    | 638   | NM_001197    | 21536418  | GCACCUAGCUCUCAAGUGA  |
| D03 | <i>BIK</i>    | 638   | NM_001197    | 21536418  | GGAGGGCAGUGACGCAUUG  |
| D04 | <i>API5</i>   | 8539  | NM_006595    | 5729729   | CAAGGUUUGUGACAUUUU   |
| D04 | <i>API5</i>   | 8539  | NM_006595    | 5729729   | GAAAGGUGGUACUAAGGAA  |
| D04 | <i>API5</i>   | 8539  | NM_006595    | 5729729   | GAACAAGAUUAAAGUCGUU  |
| D04 | <i>API5</i>   | 8539  | NM_006595    | 5729729   | AAAGAUGCCUAUCAAGUGA  |
| D05 | <i>BIRC1</i>  | 4671  | NM_022892    | 119393875 | CAAGGGAUUUGUUGACUA   |
| D05 | <i>BIRC1</i>  | 4671  | NM_022892    | 119393875 | GUACAAGAUUCCCUGUCUA  |
| D05 | <i>BIRC1</i>  | 4671  | NM_022892    | 119393875 | GUAAGAGCUAUUUGGAUA   |
| D05 | <i>BIRC1</i>  | 4671  | NM_022892    | 119393875 | GAAAUUACCCAGUAUUAUUC |
| D06 | <i>BIRC2</i>  | 329   | NM_001166    | 41349435  | UAUJAGGACCUGGAGAUAGG |
| D06 | <i>BIRC2</i>  | 329   | NM_001166    | 41349435  | GAAACAAACAGUUCAAAGU  |
| D06 | <i>BIRC2</i>  | 329   | NM_001166    | 41349435  | CAAUUGACAUGUGUGCUUC  |
| D06 | <i>BIRC2</i>  | 329   | NM_001166    | 41349435  | GAACAGAAUGGCUCUCUUU  |
| D07 | <i>BIRC3</i>  | 330   | NM_001165    | 33946283  | CAUGUGAACUGUACCGAAU  |
| D07 | <i>BIRC3</i>  | 330   | NM_001165    | 33946283  | GAAGUGUCCAUGUGUUUA   |
| D07 | <i>BIRC3</i>  | 330   | NM_001165    | 33946283  | UCAUGAUCUUGUGUUAGA   |
| D07 | <i>BIRC3</i>  | 330   | NM_001165    | 33946283  | GAUGAAUACUCCUGUGAAU  |
| D08 | <i>BIRC5</i>  | 332   | NM_001012270 | 59859879  | CAAAGGAAACCAACAAUA   |
| D08 | <i>BIRC5</i>  | 332   | NM_001012270 | 59859879  | GCAAAGGAAACCAACAAUA  |
| D08 | <i>BIRC5</i>  | 332   | NM_001012270 | 59859879  | CACCGCAUCUCUCAUUA    |
| D08 | <i>BIRC5</i>  | 332   | NM_001012270 | 59859879  | CCACUGAGAACGAGCCAGA  |
| D09 | <i>BIRC6</i>  | 57448 | NM_016252    | 153792693 | CAAAGAUACGGUUACAUA   |
| D09 | <i>BIRC6</i>  | 57448 | NM_016252    | 153792693 | GGUCAAGAUCACUUAGUA   |
| D09 | <i>BIRC6</i>  | 57448 | NM_016252    | 153792693 | GCAACGAUGUGCAUGUUA   |
| D09 | <i>BIRC6</i>  | 57448 | NM_016252    | 153792693 | ACAAGCACCUCUCGCAUUA  |
| D10 | <i>DIABLO</i> | 56616 | NM_019887    | 42544195  | GCAGAUACAGGCCUCUAUA  |
| D10 | <i>DIABLO</i> | 56616 | NM_019887    | 42544195  | CCGACAAUAACAAGUUUA   |
| D10 | <i>DIABLO</i> | 56616 | NM_019887    | 42544195  | GGAAACCACUUGGAUGACU  |
| D10 | <i>DIABLO</i> | 56616 | NM_019887    | 42544195  | UAGAAGAGCUCCGUCAGAA  |
| D11 | <i>BIRC4</i>  | 331   | NM_001167    | 32528298  | GAGGAACCCUGCCAUGUAU  |
| D11 | <i>BIRC4</i>  | 331   | NM_001167    | 32528298  | GCACGGAUCUUUACUUUUG  |
| D11 | <i>BIRC4</i>  | 331   | NM_001167    | 32528298  | GAACUGGGCAGGUUGUAGA  |

|     |              |       |              |          |                      |
|-----|--------------|-------|--------------|----------|----------------------|
| D11 | <i>BIRC4</i> | 331   | NM_001167    | 32528298 | GAGGAGGGCUAACUGAUUG  |
| E02 | <i>PDCD8</i> | 9131  | NM_004208    | 22202627 | GGUAGAAACUGACCACAUUA |
| E02 | <i>PDCD8</i> | 9131  | NM_004208    | 22202627 | CAAGGAAGAUCAUUAAGGA  |
| E02 | <i>PDCD8</i> | 9131  | NM_004208    | 22202627 | GCAUGAAGAUCUCAUUGAA  |
| E02 | <i>PDCD8</i> | 9131  | NM_004208    | 22202627 | GAACAUCUUUAACCGAAUG  |
| E03 | <i>APAF1</i> | 317   | NM_181869    | 32483362 | GAACAAGCUCAUAGUUAUUA |
| E03 | <i>APAF1</i> | 317   | NM_181869    | 32483362 | GUAUGAUGGAGCUGCAAAU  |
| E03 | <i>APAF1</i> | 317   | NM_181869    | 32483362 | AGAUAAUGAUUCCUACGUA  |
| E03 | <i>APAF1</i> | 317   | NM_181869    | 32483362 | CAGUAAUGGGUCCUAAAUA  |
| E04 | <i>AVEN</i>  | 57099 | NM_020371    | 56699476 | UAACUGGGAUCGAUAUCAAA |
| E04 | <i>AVEN</i>  | 57099 | NM_020371    | 56699476 | GAUUAGGGAUGCAGUUAAA  |
| E04 | <i>AVEN</i>  | 57099 | NM_020371    | 56699476 | GAACAGGGAAAUUAUUCUA  |
| E04 | <i>AVEN</i>  | 57099 | NM_020371    | 56699476 | GUUAUUGGUUCGAGCCCUU  |
| E05 | <i>BFAR</i>  | 51283 | NM_016561    | 7706090  | CAUCAUCAUUGCUAUGUUA  |
| E05 | <i>BFAR</i>  | 51283 | NM_016561    | 7706090  | ACGAGUAAAUGGAAGGUUG  |
| E05 | <i>BFAR</i>  | 51283 | NM_016561    | 7706090  | GCUACGACAUCUGGUUUA   |
| E05 | <i>BFAR</i>  | 51283 | NM_016561    | 7706090  | CAAGACGCCCUAUACCAUA  |
| E06 | <i>CFLAR</i> | 8837  | NM_003879    | 21361768 | UAAAGAACAUCCACAGAAU  |
| E06 | <i>CFLAR</i> | 8837  | NM_003879    | 21361768 | AAUAACUUCAGGCUCCAUA  |
| E06 | <i>CFLAR</i> | 8837  | NM_003879    | 21361768 | GAUGUGUCCUCAUUAUUU   |
| E06 | <i>CFLAR</i> | 8837  | NM_003879    | 21361768 | GCUAUGAAGUCCAGAAAU   |
| E07 | <i>CRADD</i> | 8738  | NM_003805    | 51988883 | ACAAUGCUCUGCUGGAUA   |
| E07 | <i>CRADD</i> | 8738  | NM_003805    | 51988883 | UAGAUUCCCUACAGGAGUU  |
| E07 | <i>CRADD</i> | 8738  | NM_003805    | 51988883 | ACGGAUAUCUACCGCUGUA  |
| E07 | <i>CRADD</i> | 8738  | NM_003805    | 51988883 | GGCCAGAGACAAACAAGUA  |
| E08 | <i>CYCS</i>  | 54205 | NM_018947    | 34328939 | GGAAGAAAGGGCAGACUUA  |
| E08 | <i>CYCS</i>  | 54205 | NM_018947    | 34328939 | GCAUUAGAAGAAGGAAGA   |
| E08 | <i>CYCS</i>  | 54205 | NM_018947    | 34328939 | ACACAGCCGCCAAUAAGAA  |
| E08 | <i>CYCS</i>  | 54205 | NM_018947    | 34328939 | GCACAAGACUGGGCCAAU   |
| E09 | <i>DAXX</i>  | 1616  | NM_001350    | 53828721 | GGAGUUGGAUCUCUCAGAA  |
| E09 | <i>DAXX</i>  | 1616  | NM_001350    | 53828721 | GGAAACAGCUAUGUGGAAA  |
| E09 | <i>DAXX</i>  | 1616  | NM_001350    | 53828721 | CUACAGAUCUCCAAUGAAA  |
| E09 | <i>DAXX</i>  | 1616  | NM_001350    | 53828721 | GCUACAAGCUGGAGAAUGA  |
| E10 | <i>DEDD</i>  | 9191  | NM_001039712 | 89353286 | GGACGUGACUUCUUAUUGG  |
| E10 | <i>DEDD</i>  | 9191  | NM_001039712 | 89353286 | GGCAAUGUCUUCUCUAAACA |
| E10 | <i>DEDD</i>  | 9191  | NM_001039712 | 89353286 | UCACCUACCUCGAUGCAUU  |
| E10 | <i>DEDD</i>  | 9191  | NM_001039712 | 89353286 | CUACAUCAUUGGCUCUUUA  |
| E11 | <i>TOSO</i>  | 9214  | NM_005449    | 34147517 | GCAAGAAUCUGUCCUAGU   |
| E11 | <i>TOSO</i>  | 9214  | NM_005449    | 34147517 | GCAAUACCCACGCAAGAAU  |
| E11 | <i>TOSO</i>  | 9214  | NM_005449    | 34147517 | GGUUUCAUCUGCCCUAUUU  |
| E11 | <i>TOSO</i>  | 9214  | NM_005449    | 34147517 | GAAUACAAGGGCCGAGUUA  |
| F02 | <i>MOAP1</i> | 64112 | NM_022151    | 73747827 | GAAGAGAAGGCGAUUGCUA  |
| F02 | <i>MOAP1</i> | 64112 | NM_022151    | 73747827 | GAGGAGCAAUUGAGAGAGA  |
| F02 | <i>MOAP1</i> | 64112 | NM_022151    | 73747827 | AGGAAAAGUUGUCGGCUUA  |
| F02 | <i>MOAP1</i> | 64112 | NM_022151    | 73747827 | GGAAAGCGCUAUUGAUUGC  |

**STable 2: siRNAs in apoptosis screen.** All siRNAs present in the apoptosis screen are shown as well as gene id, asseccion number, GI number and sequence.
