# Supplementary material for: Targeting survivin as a potential new treatment for chondrosarcoma of bone
Source: PubMed Central journal article supplement (PMC4945750; doi:10.1038/oncsis.2016.33), 2016-05-09
Supplement: oncsis201633x9.pdf [file oncsis201633x9.pdf]

**Supplementary table 3**

| Sample       | Grade          | IDH Mutation | Amount |
|--------------|----------------|--------------|--------|
| Tumour       | Low            | <i>IDH1</i>  | 14     |
|              |                | <i>IDH2</i>  | 1      |
|              |                | Wild type    | 4      |
|              | High           | <i>IDH1</i>  | 6      |
|              |                | <i>IDH2</i>  | 4      |
|              |                | Wild type    | 5      |
| Growth plate | Not applicable | N/A          | 3      |
| Cartilage    | Not applicable | N/A          | 3      |

**Stable 3: Patient samples subjected to survivin expression analysis by Q-PCR.** Information of RNA samples used to evaluate survivin expression. Shown are grade, mutation status and amounts.
